# Supplementary material
Source: Springer Nature journal article supplement (https://www.springermedizin.de/resource/supplementary/12888_2014_1654_MOESM7_ESM.pdf/9481114)

# Resting state networks

Medial Visual Cortex

Lateral Visual Cortex

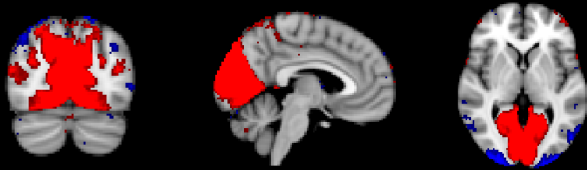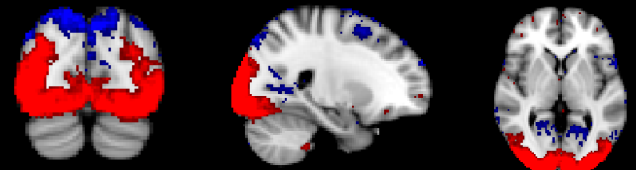

R

Auditory system

Sensory-motor system

L

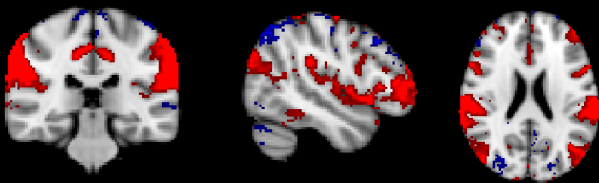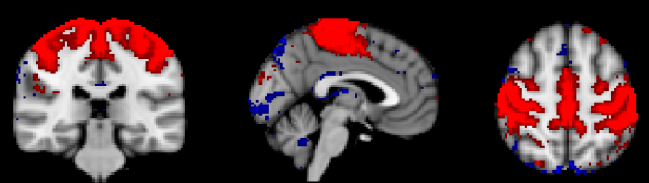

Anterior Default Mode Network

Posterior Default Mode Network

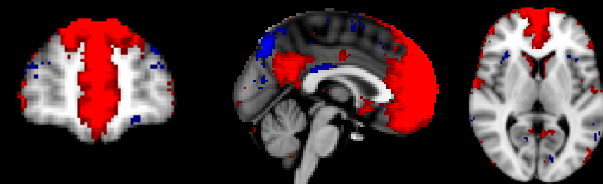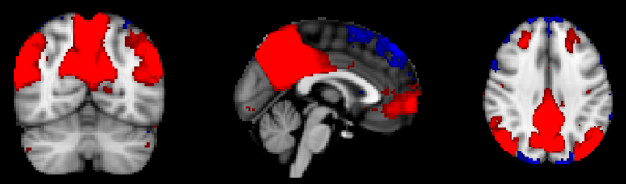

R

Left fronto-parietal network

Right fronto-parietal network

L

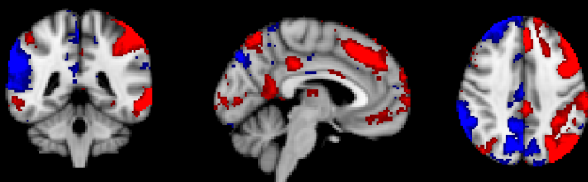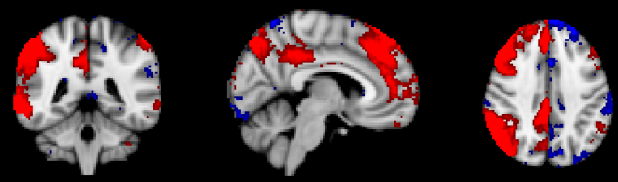

Executive control

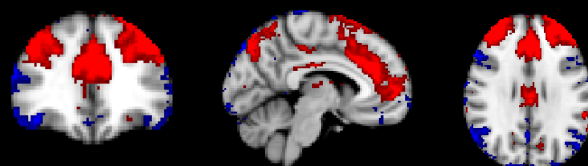

Supplement: MOESM7 [file 9481114]
